# Supplementary material
Source: publisher figshare collection journal article supplement (https://karger.figshare.com/articles/dataset/_/4585246)
Supplement: Supplementary file 1 [file 1]

Table S2: Supplementary table Cheek

|                                                   |    | NSS                |  | SS |                   | AR |    | AD                |  | SS vs | SS vs | SS vs | NSS vs | NSS vs | AD vs |
|---------------------------------------------------|----|--------------------|--|----|-------------------|----|----|-------------------|--|-------|-------|-------|--------|--------|-------|
|                                                   | n  | median (range)     |  | n  | median (range)    |    | n  | median (range)    |  | NSS   | AD    | AR    | AD     | AR     | AR    |
| Water levels [g <sub>w</sub> /100g <sub>t</sub> ] |    |                    |  |    |                   |    |    |                   |  |       |       |       |        |        |       |
| 0                                                 | 30 | 32.7 (10.6-43.2)   |  | 28 | 33.2 (15.4-45.0)  |    | 27 | 31.5 (18.0-42.1)  |  | ns.   | ns.   | ns.   | ns.    | ns.    | ns.   |
| 4                                                 | 30 | 36.4 (22.5-45.4)   |  | 28 | 36.1 (19.4-49.5)  |    | 27 | 35.3 (22.8-44.6)  |  | ns.   | ns.   | ns.   | ns.    | ns.    | ns.   |
| 8                                                 | 30 | 49.2 (38.9-57.4)   |  | 28 | 49.5 (29.5-61.9)  |    | 27 | 47.8 (35.1-56.6)  |  | ns.   | ns.   | ns.   | ns.    | ns.    | ns.   |
| 12                                                | 30 | 61.4 (50.8-66.0)   |  | 28 | 60.7 (41.8-67.5)  |    | 27 | 60.9 (48.3-65.1)  |  | ns.   | ns.   | ns.   | ns.    | ns.    | ns.   |
| 16                                                | 30 | 66.5 (59.6-69.3)   |  | 28 | 66.4 (56.7-69.3)  |    | 27 | 66.7 (57.2-69.5)  |  | ns.   | ns.   | ns.   | ns.    | ns.    | ns.   |
| 20                                                | 30 | 68.6 (62.3-70.6)   |  | 28 | 68.2 (64.9-71.1)  |    | 27 | 68.8 (64.3-71.4)  |  | ns.   | ns.   | ns.   | ns.    | ns.    | ns.   |
| 24                                                | 30 | 69.5 (62.9-71.8)   |  | 28 | 69.6 (67.2-72.1)  |    | 27 | 69.8 (67.5-72.6)  |  | ns.   | ns.   | ns.   | ns.    | ns.    | ns.   |
| 28                                                | 30 | 69.9 (63.4-72.9)   |  | 28 | 70.1 (68.0-72.5)  |    | 27 | 70.5 (68.0-73.7)  |  | ns.   | ns.   | ns.   | ns.    | ns.    | ns.   |
| 32                                                | 30 | 70.4 (63.9-72.9)   |  | 28 | 70.3 (68.7-72.7)  |    | 27 | 70.6 (68.3-74.3)  |  | ns.   | ns.   | ns.   | ns.    | ns.    | ns.   |
| NMF levels [a.u.]                                 |    |                    |  |    |                   |    |    |                   |  |       |       |       |        |        |       |
| 0                                                 | 30 | 0.9 (0.5-1.4)      |  | 28 | 0.9 (0.5-1.5)     |    | 27 | 0.8 (0.4-1.4)     |  | ns.   | ns.   | ns.   | ns.    | 0.080  | ns.   |
| 4                                                 | 30 | 1.0 (0.6-1.4)      |  | 28 | 0.9 (0.5-1.7)     |    | 27 | 0.9 (0.5-1.5)     |  | ns.   | ns.   | ns.   | ns.    | ns.    | ns.   |
| 8                                                 | 30 | 0.7 (0.4-1.3)      |  | 28 | 0.7 (0.4-1.2)     |    | 27 | 0.6 (0.4-1.1)     |  | ns.   | ns.   | ns.   | 0.065  | ns.    | ns.   |
| 12                                                | 30 | 0.4 (0.3-0.9)      |  | 28 | 0.4 (0.3-0.7)     |    | 27 | 0.4 (0.3-0.9)     |  | ns.   | ns.   | ns.   | 0.057  | ns.    | ns.   |
| 16                                                | 30 | 0.4 (0.3-0.6)      |  | 28 | 0.4 (0.3-0.7)     |    | 27 | 0.4 (0.3-0.6)     |  | ns.   | ns.   | ns.   | 0.080  | ns.    | ns.   |
| Ceramide levels [a.u.]                            |    |                    |  |    |                   |    |    |                   |  |       |       |       |        |        |       |
| 0                                                 | 30 | 111.7 (63.2-175.4) |  | 28 | 99.5 (49.9-192.7) |    | 27 | 96.7 (43.7-233.4) |  | ns.   | ns.   | ns.   | ns.    | 0.095  | ns.   |
| 4                                                 | 30 | 103.6 (60.3-180.3) |  | 28 | 92.2 (52.0-191.6) |    | 27 | 86.9 (43.0-177.7) |  | ns.   | ns.   | ns.   | 0.085  | ns.    | ns.   |
| 8                                                 | 30 | 60.7 (31.9-105.5)  |  | 28 | 53.7 (38.2-118.6) |    | 27 | 54.2 (28.0-108.7) |  | 0.086 | ns.   | ns.   | 0.097  | ns.    | ns.   |
| 12                                                | 30 | 42.1 (26.0-69.8)   |  | 28 | 39.8 (29.2-64.0)  |    | 27 | 40.2 (23.2-79.8)  |  | ns.   | ns.   | ns.   | ns.    | ns.    | ns.   |
| 16                                                | 30 | 35.8 (21.0-55.8)   |  | 28 | 32.5 (23.3-55.7)  |    | 27 | 34.1 (21.6-59.8)  |  | ns.   | ns.   | ns.   | ns.    | ns.    | ns.   |

AD: atopic dermatitis; AR: allergic rhinoconjunctivitis; a.u.: arbitrary units;  $g_w/100g_t$ : grams of water/100 grams of wet tissue; NMF: natural moisturizing factor; ns: no statistically significant difference; NSS: non-sensitive skin; SS: sensitive skin.
