# Supplementary material
Source: publisher figshare collection journal article supplement (https://karger.figshare.com/articles/dataset/_/4585246)
Supplement: Supplementary file 2 [file 1]

**Table S3: Supplementary table Thenar**

|                               | NSS |                  | SS |                  | AR |                  | AD |                  | SS vs | SS vs | SS vs | NSS vs | NSS vs | AD vs |
|-------------------------------|-----|------------------|----|------------------|----|------------------|----|------------------|-------|-------|-------|--------|--------|-------|
|                               | n   | med (range)      | n  | med (range)      | n  | med (range)      | n  | med (range)      | NSS   | AD    | AR    | AD     | AR     | AR    |
| Water levels [ $g_w/100g_t$ ] |     |                  |    |                  |    |                  |    |                  |       |       |       |        |        |       |
| 0                             | 29  | 28.6 (11.4-38.4) | 28 | 26.5 (13.4-41.6) | 27 | 24.0 (13.5-37.2) | 11 | 20.6 (10.5-37.3) | ns.   | ns.   | ns.   | ns.    | ns.    | ns.   |
| 10                            | 29  | 32.1 (20.7-42.4) | 28 | 31.8 (20.5-40.1) | 27 | 31.0 (21.1-37.7) | 11 | 29.3 (21.1-45.6) | ns.   | ns.   | ns.   | ns.    | ns.    | ns.   |
| 20                            | 29  | 34.4 (28.4-40.3) | 28 | 34.9 (29.8-41.8) | 27 | 33.7 (26.6-41.4) | 11 | 33.7 (25.4-43.8) | ns.   | ns.   | ns.   | ns.    | ns.    | ns.   |
| 30                            | 29  | 37.9 (32.6-44.2) | 28 | 36.9 (32.1-51.0) | 27 | 36.5 (31.1-51.4) | 11 | 37.0 (30.0-51.1) | ns.   | ns.   | ns.   | ns.    | ns.    | ns.   |
| 40                            | 29  | 38.0 (34.2-48.0) | 28 | 38.3 (33.8-60.9) | 27 | 38.1 (32.7-62.0) | 11 | 38.9 (32.0-62.6) | ns.   | ns.   | ns.   | ns.    | ns.    | ns.   |
| 50                            | 29  | 39.1 (35.0-57.0) | 28 | 39.9 (35.2-63.7) | 27 | 39.8 (33.3-65.1) | 11 | 39.9 (31.7-65.8) | ns.   | ns.   | ns.   | ns.    | ns.    | ns.   |
| 60                            | 29  | 42.5 (35.6-62.0) | 28 | 42.4 (36.6-65.9) | 27 | 41.3 (33.8-67.4) | 11 | 41.5 (33.1-67.1) | ns.   | ns.   | ns.   | ns.    | ns.    | ns.   |
| 70                            | 29  | 45.6 (36.4-63.5) | 28 | 45.9 (37.6-67.5) | 27 | 43.3 (34.4-69.0) | 11 | 41.7 (34.3-67.9) | ns.   | ns.   | ns.   | ns.    | ns.    | ns.   |
| 80                            | 29  | 51.3 (37.3-64.5) | 28 | 52.1 (38.6-68.7) | 27 | 45.5 (34.7-70.0) | 11 | 49.0 (34.6-68.7) | ns.   | ns.   | ns.   | ns.    | ns.    | ns.   |
| 90                            | 29  | 58.3 (38.3-65.5) | 28 | 57.5 (39.6-69.3) | 27 | 50.4 (34.3-71.1) |    | 55.5 (35.6-70.0) | ns.   | ns.   | ns.   | ns.    | ns.    | ns.   |
| 100                           | 29  | 61.3 (39.4-66.7) | 28 | 61.5 (40.5-69.9) | 27 | 55.7 (34.0-71.8) |    | 58.3 (38.2-71.5) | ns.   | ns.   | ns.   | ns.    | ns.    | ns.   |
| 120                           | 29  | 65.6 (41.0-67.7) | 28 | 63.6 (42.6-71.9) | 27 | 61.5 (37.0-73.1) |    | 61.9 (43.8-73.1) | ns.   | ns.   | ns.   | ns.    | ns.    | ns.   |
| 150                           | 29  | 66.8 (56.1-70.2) | 28 | 65.7 (47.4-74.1) | 27 | 64.6 (45.2-74.6) |    | 65.8 (50.4-75.2) | ns.   | ns.   | ns.   | ns.    | ns.    | ns.   |
| NMF levels [a.u.]             |     |                  |    |                  |    |                  |    |                  |       |       |       |        |        |       |
| 0                             | 29  | 1.4 (0.9-3.0)    | 28 | 1.5 (1.0-2.6)    | 27 | 1.6 (0.9-2.3)    | 11 | 1.5 (0.8-2.5)    | ns.   | ns.   | ns.   | ns.    | ns.    | ns.   |
| 10                            | 29  | 1.8 (1.2-2.2)    | 28 | 1.8 (1.2-2.4)    | 27 | 2.0 (1.1-2.5)    | 11 | 1.9 (0.9-2.2)    | ns.   | ns.   | ns.   | ns.    | 0.043  | ns.   |
| 20                            | 29  | 1.8 (1.1-2.2)    | 28 | 1.9 (1.3-2.5)    | 27 | 2.0 (1.1-2.6)    | 11 | 1.9 (0.9-2.3)    | ns.   | ns.   | ns.   | ns.    | 0.063  | ns.   |
| 30                            | 29  | 1.8 (1.1-2.2)    | 28 | 1.9 (1.0-2.6)    | 27 | 2.0 (1.1-2.5)    | 11 | 1.9 (0.8-2.3)    | ns.   | ns.   | ns.   | ns.    | 0.069  | ns.   |
| 40                            | 29  | 1.8 (0.7-2.2)    | 28 | 1.8 (0.5-2.6)    | 27 | 1.9 (1.0-2.56)   | 11 | 1.9 (0.5-2.1)    | ns.   | ns.   | ns.   | ns.    | ns.    | ns.   |
| 50                            | 29  | 1.7 (0.5-2.1)    | 28 | 1.7 (0.4-2.4)    | 27 | 1.8 (0.8-2.4)    | 11 | 1.7 (0.4-2.0)    | ns.   | ns.   | ns.   | ns.    | ns.    | ns.   |

AD: atopic dermatitis; AR: allergic rhinoconjunctivitis; a.u.: arbitrary units;  $g_w/100g_t$ : grams of water/100 grams of wet tissue; NMF: natural moisturizing factor; ns: no statistically significant difference; NSS: non-sensitive skin; SS: sensitive skin.
