# Supplementary material
Source: publisher figshare collection journal article supplement (https://karger.figshare.com/articles/dataset/_/4585246)
Supplement: Supplementary file 3 [file 1]

**Table S1: Supplementary table Forearm**

|                               | NSS |                   | SS |                   | AR |                  | AD |                  | SS vs | SS vs | SS vs | NSS vs | NSS vs | AD vs |
|-------------------------------|-----|-------------------|----|-------------------|----|------------------|----|------------------|-------|-------|-------|--------|--------|-------|
|                               | n   | median (range)    | n  | median (range)    | n  | median (range)   | n  | median (range)   | NSS   | AD    | AR    | AD     | AR     | AR    |
| Water levels [ $g_w/100g_t$ ] |     |                   |    |                   |    |                  |    |                  |       |       |       |        |        |       |
| 0                             | 29  | 31.3 (23.3-41.2)  | 27 | 30.4 (21.9-41.6)  | 26 | 30.6 (23.2-37.1) | 11 | 29.3 (23.3-35.8) | ns.   | ns.   | ns.   | ns.    | ns.    | ns.   |
| 4                             | 29  | 33.1 (26.8-40.5)  | 27 | 32.7 (23.2-39.7)  | 26 | 31.8 (25.3-38.0) | 11 | 32.5 (28.0-37.8) | ns.   | ns.   | ns.   | ns.    | ns.    | ns.   |
| 8                             | 29  | 41.4 (37.3-49.0)  | 27 | 42.4 (28.4-50.8)  | 26 | 40.2 (33.5-49.5) | 11 | 43.1 (38.0-49.8) | ns.   | ns.   | ns.   | ns.    | ns.    | ns.   |
| 12                            | 29  | 54.4 (45.4-60.8)  | 27 | 54.8 (37.3-62.1)  | 26 | 53.8 (43.9-60.7) | 11 | 55.6 (47.5-60.5) | ns.   | ns.   | ns.   | ns.    | ns.    | ns.   |
| 16                            | 29  | 62.8 (52.2-65.8)  | 27 | 63.2 (48.7-65.9)  | 26 | 62.9 (55.1-66.1) | 11 | 62.8 (58.0-65.3) | ns.   | ns.   | ns.   | ns.    | ns.    | ns.   |
| 20                            | 29  | 66.0 (58.2-67.9)  | 27 | 66.2 (59.0-68.3)  | 26 | 65.9 (61.9-68.1) | 11 | 65.6 (62.7-67.8) | ns.   | ns.   | ns.   | ns.    | ns.    | ns.   |
| 24                            | 29  | 66.9 (61.3-68.9)  | 27 | 67.4 (64.3-68.8)  | 26 | 66.9 (64.3-69.2) | 11 | 67.0 (64.3-68.7) | ns.   | ns.   | ns.   | ns.    | ns.    | ns.   |
| 28                            | 29  | 67.7 (62.8-68.9)  | 27 | 68.1 (66.0-69.2)  | 26 | 67.4 (65.5-69.6) | 11 | 67.1 (65.5-68.6) | ns.   | ns.   | ns.   | ns.    | ns.    | ns.   |
| 32                            | 29  | 68.2 (65.9-69.2)  | 27 | 68.5 (66.7-70.2)  | 26 | 67.8 (66.0-69.8) | 11 | 67.2 (66.2-69.0) | ns.   | ns.   | ns.   | ns.    | ns.    | ns.   |
| NMF levels [a.u.]             |     |                   |    |                   |    |                  |    |                  |       |       |       |        |        |       |
| 0                             | 29  | 1.2 (0.6-1.7)     | 27 | 1.2 (0.8-1.8)     | 26 | 1.2 (0.8-1.7)    | 11 | 1.2 (0.7-1.7)    | ns.   | ns.   | ns.   | ns.    | ns.    | ns.   |
| 4                             | 29  | 1.3 (0.7-1.9)     | 27 | 1.4 (0.9-2.0)     | 26 | 1.4 (0.7-2.0)    | 11 | 1.2 (0.7-1.7)    | ns.   | 0.095 | ns.   | ns.    | ns.    | ns.   |
| 8                             | 29  | 1.1 (0.6-2.0)     | 27 | 1.1 (0.7-2.0)     | 26 | 1.0 (0.6-1.9)    | 11 | 0.9 (0.6-1.4)    | ns.   | ns.   | ns.   | ns.    | ns.    | ns.   |
| 12                            | 29  | 0.6 (0.3-1.4)     | 27 | 0.6 (0.5-1.4)     | 26 | 0.6 (0.4-1.5)    | 11 | 0.5 (0.4-0.8)    | ns.   | ns.   | ns.   | ns.    | ns.    | ns.   |
| 16                            | 29  | 0.5 (0.3-0.9)     | 27 | 0.4 (0.3-0.8)     | 26 | 0.4 (0.3-0.8)    | 11 | 0.4 (0.3-0.5)    | ns.   | ns.   | ns.   | ns.    | ns.    | ns.   |
| Ceramides levels [a.u.]       |     |                   |    |                   |    |                  |    |                  |       |       |       |        |        |       |
| 0                             | 29  | 57.8 (27.3-121.7) | 27 | 57.2 (38.5-108.8) | 26 | 61.0 (38.1-97.1) | 11 | 57.5 (37.1-96.8) | ns.   | ns.   | ns.   | ns.    | ns.    | ns.   |
| 4                             | 29  | 54.3 (29.5-107.5) | 27 | 56.9 (44.6-90.6)  | 26 | 56.7 (32.5-80.3) | 11 | 52.7 (39.6-69.4) | ns.   | ns.   | ns.   | ns.    | ns.    | ns.   |
| 8                             | 29  | 41.9 (24.4-77.6)  | 27 | 44.3 (38.8-65.4)  | 26 | 42.1 (17.9-55.9) | 11 | 38.6 (30.3-50.1) | 0.059 | 0.001 | 0.065 | ns.    | ns.    | ns.   |
| 12                            | 29  | 35.0 (21.1-59.2)  | 27 | 38.6 (27.5-50.8)  | 26 | 34.4 (23.5-47.4) | 11 | 33.4 (25.8-43.0) | 0.064 | 0.004 | 0.060 | 0.096  | ns.    | ns.   |
| 16                            | 29  | 29.8 (18.4-44.8)  | 27 | 31.3 (21.9-39.8)  | 26 | 28.5 (20.7-42.1) | 11 | 26.8 (21.8-32.0) | ns.   | 0.019 | ns.   | 0.064  | ns.    | ns.   |

AD: atopic dermatitis; AR: allergic rhinoconjunctivitis; a.u.: arbitrary units;  $g_w/100g_t$ : grams of water/100 grams of wet tissue; NMF: natural moisturizing factor; ns: no statistically significant difference; NSS: non-sensitive skin; SS: sensitive skin.
