# Supplementary material
Source: publisher figshare collection journal article supplement (https://karger.figshare.com/articles/dataset/_/4585246)
Supplement: Supplementary file 4 [file 1]

**Table S4: Supplementary table Filaggrin mutations**

|                                                      | n  | FLG <sup>+/+</sup><br>median (range) | n  | FLG <sup>+/-</sup> and FLG <sup>-/-</sup><br>median (range) |       |
|------------------------------------------------------|----|--------------------------------------|----|-------------------------------------------------------------|-------|
| <i>CRS parameters Forearm</i>                        |    |                                      |    |                                                             |       |
| SC thickness [μm]                                    | 82 | 16.5 (13.5-24.2)                     | 10 | 15.7 (14.1-17.9)                                            | 0.058 |
| AUC Water 4-SC [g <sub>w</sub> /100g <sub>t</sub> ]  | 82 | 612.7 (478.6-1010.0)                 | 10 | 584.4 (505.8-674.9)                                         | 0.071 |
| Average NMF 4-12μm [a.u.]                            | 82 | 1.0 (0.6-1.8)                        | 10 | 0.9 (0.5-1.2)                                               | 0.017 |
| Average Cer 4-12μm [a.u.]                            | 82 | 44.7 (24.6-81.5)                     | 10 | 44.4 (33.9-56.0)                                            | 1     |
| <i>CRS parameters Cheek</i>                          |    |                                      |    |                                                             |       |
| SC thickness [μm]                                    | 84 | 14.1 (10.8-21.5)                     | 10 | 13.7 (11.6-14.5)                                            | ns.   |
| AUC Water 4-SC [g <sub>w</sub> /100g <sub>t</sub> ]  | 84 | 508.9 (393.4-780.4)                  | 10 | 491.8 (417.7-562.7)                                         | ns.   |
| Average NMF 4-8μm [a.u.]                             | 84 | 0.8 (0.4-1.5)                        | 10 | 0.7 (0.5-1.2)                                               | ns.   |
| Average Cer 4-8μm [a.u.]                             | 84 | 74.7 (35.4-155.1)                    | 10 | 75.7 (45.1-87.2)                                            | ns.   |
| <i>CRS parameters Thenar</i>                         |    |                                      |    |                                                             |       |
| SC thickness [μm]                                    | 85 | 101.9 (40.1-159.6)                   | 10 | 66.9 (41.4-120.2)                                           | 0.000 |
| AUC Water 10-SC [g <sub>w</sub> /100g <sub>t</sub> ] | 85 | 3917.7 (1401.8-6659.5)               | 10 | 2500.0 (1447.8-4279.1)                                      | 0.000 |
| Average NMF 10-50μm [a.u.]                           | 85 | 1.9 (1.1-2.6)                        | 10 | 0.9 (0.6-1.1)                                               | 0.000 |

*a.u.*: arbitrary units; *AUC*: area-under-curve; *Cer*: ceramides/fatty acids; *CRS*: confocal Raman micro-spectroscopy; *FLG*<sup>-/-</sup>: homozygous filaggrin mutation; *FLG*<sup>+/-</sup>: heterozygous filaggrin mutation; *FLG*<sup>+/+</sup>: no filaggrin mutation; *g<sub>w</sub>/100g<sub>t</sub>*: grams of water/100 grams of wet tissue; *ns*: no statistically significant difference; *NMF*: natural moisturizing factor; *SC*: stratum corneum.
